# Supplementary material for: Effect of Washing on the Electrochemical Performance of a Three-Dimensional Current Collector for Energy Storage Applications
Source: MDPI journal article supplement (doi:10.3390/nano11061596), 2021-06-17
Supplement: s1 [file s1]

# Effect of Washing on the Electrochemical Performance of a Three-Dimensional Current Collector for Energy Storage Applications

Sajid Ali Ansari <sup>1,\*</sup>, Nazish Parveen <sup>2</sup>, Mohd Al Saleh Al-Othoum <sup>1</sup> and Mohammad Omaish Ansari <sup>3</sup>

<sup>1</sup> Department of Physics, College of Science, King Faisal University, P.O. Box 400, Hofuf 31982, Al-Ahsa, Saudi Arabia; malothoum@kfu.edu.sa

<sup>2</sup> Department of Chemistry, College of Science, King Faisal University, P.O. Box 380, Hofuf 31982, Al-Ahsa, Saudi Arabia; nislam@kfu.edu.sa

<sup>3</sup> Center of Nanotechnology, King Abdulaziz University, Jeddah 21589, Saudi Arabia; moansari@kau.edu.sa

\* Correspondence: sansari@kfu.edu.sa; Tel.: +966-13-589-9598

**The fitted equivalent circuit**

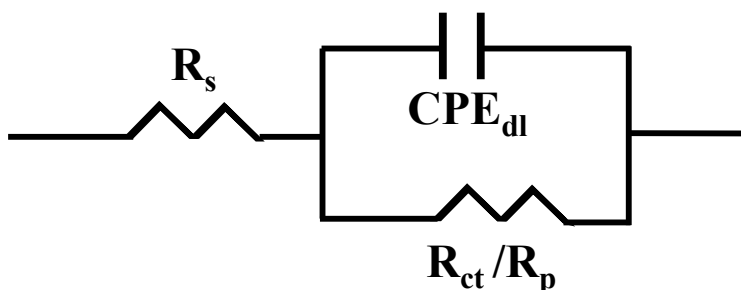

**Figure S1.** The fitted equivalent circuit of the fabricated electrode.

**EIS fitted graph of the 3D-NF-C**

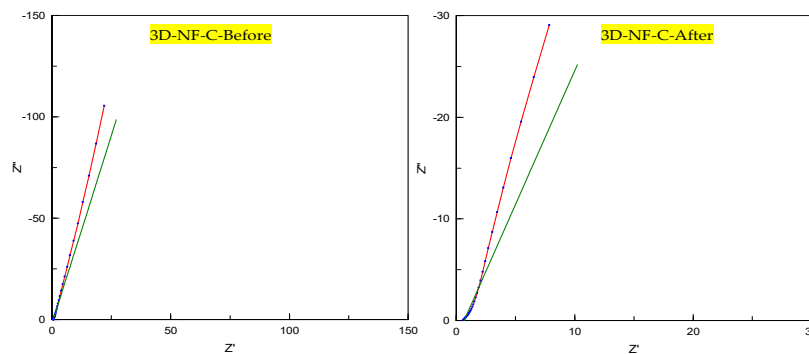

**Figure S2.** EIS fitted graph of the 3D-NF-C.

### EIS fitted graph of the 3D-NF-etOH

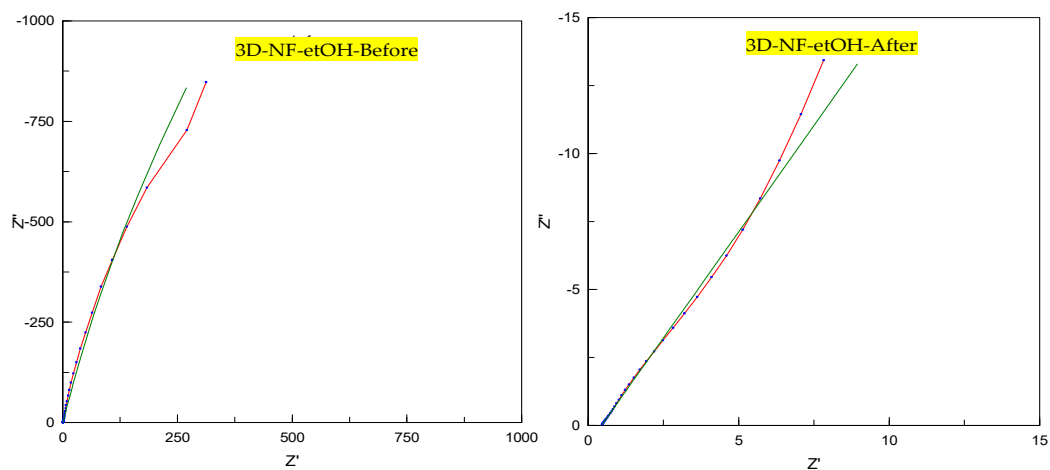

**Figure S3.** EIS fitted graph of the 3D-NF-etOH.

### EIS fitted graph of the 3D-NF-1MH

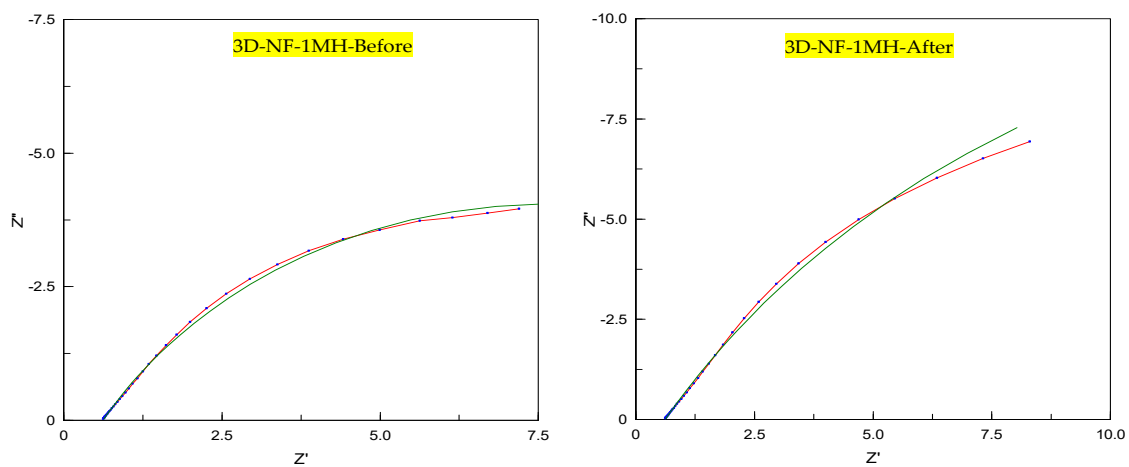

**Figure S4.** EIS fitted graph of the 3D-NF-1MH.

## EIS fitted graph of the 3D-NF-3MH

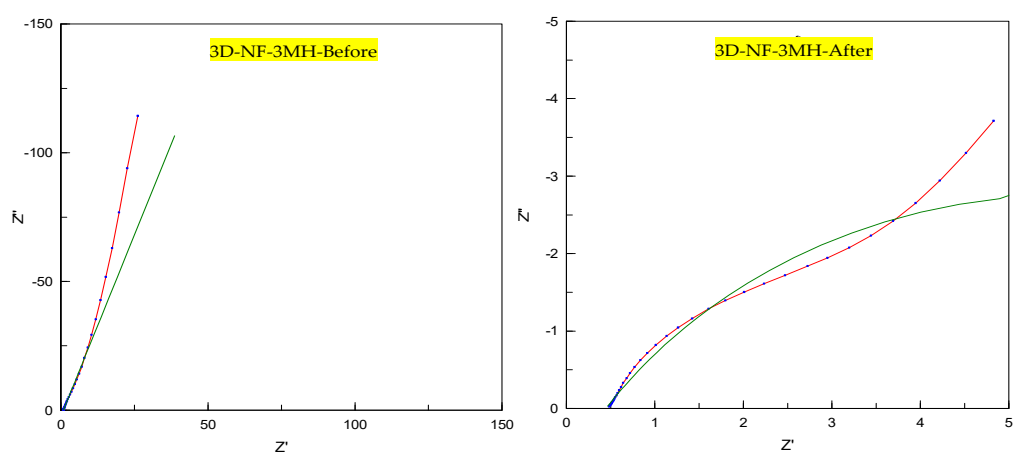

**Figure S5.** EIS fitted graph of the 3D-NF-3MH.
